# Supplementary material for: Photochemical synthesis of benzoyl spiro[2.2]pentanes
Source: Royal Society of Chemistry journal article supplement (doi:10.1039/b610181j), 2006-09-05
Supplement: b610181j.pdf [file b610181j.pdf]

## **Photochemical Synthesis of Benzoyl Spiro[2.2]pentane**

Olaf Muehling, Pablo Wessig \*

Humboldt-Universität zu Berlin, Institut für Chemie, Brook-Taylor-Str. 2,  
12489 Berlin, Germany. Fax: (+49)30-2093-7450; Tel: (+49)30-2093-7455;  
E-mail: [pablo.wessig@chemie.hu-berlin.de](mailto:pablo.wessig@chemie.hu-berlin.de)

# 1 Supplementary Information

## 1.1.1 Quantum chemical calculations (B3PW91/6-31G\*//B3PW91/6-31G\*)

The geometry optimization were performed with the *ab initio* program package GAUSSIAN 98<sup>1</sup>, the B3PW91 hybrid functional<sup>2,3,4</sup>, and the 6-31G\* basis set. At the same level of theory, frequency calculations were carried out to characterize each structure as minimum (**21**, **22**, **15**, **12**) or transition state (**TS-21**, **TS-22**, **TS-15**, **TS-12**) and to obtain the zero-point vibrational energies.

| structure    | E [a.u.] <sup>[a]</sup> | E<br>[kcal/mol] | ZPE<br>[kcal/mol] <sup>[b]</sup> | E + ZPE<br>[kcal/mol] | E <sub>rel</sub> [kcal/mol] <sup>[c]</sup> |
|--------------|-------------------------|-----------------|----------------------------------|-----------------------|--------------------------------------------|
| <b>21</b>    | - 541.8378692           | - 340008.41     | 156.81579                        | - 339851.87           | ± 0.0                                      |
| <b>TS-21</b> | - 541.8315906           | - 340004.47     | 153.68497                        | - 339851.06           | + 3.9 (+ 0.8)                              |
| <b>22</b>    | - 1204.7942852          | - 756019.86     | 183.58912                        | - 755836.87           | ± 0.0                                      |
| <b>TS-22</b> | - 1204.7920961          | - 756018.49     | 181.14821                        | - 755837.94           | + 1.4 (- 1.1)                              |
| <b>15</b>    | - 540.5962682           | - 339229.29     | 142.91041                        | - 339086.65           | ± 0.0                                      |
| <b>TS-15</b> | - 540.5803766           | - 339219.32     | 139.23719                        | - 339080.35           | + 10.0 (+ 6.3)                             |
| <b>12</b>    | - 1203.5534998          | - 755241.26     | 169.80897                        | - 755072.05           | ± 0.0                                      |
| <b>TS-12</b> | - 1203.5416236          | - 755233.80     | 166.41963                        | - 755067.98           | + 7.5 (+ 4.1)                              |

[a]: Electronic energy (B3PW91/6-31G\*), 1 a.u. = 627.5095 kcal/mol. [b] Zero-point vibrational energy (B3PW91/6-31G\*).

[c]: Energy relating to **21**, **22**, **15** or **12** respectively. The value in parentheses includes the zero-point vibrational energy.

|                               |                              |            |           |            |
|-------------------------------|------------------------------|------------|-----------|------------|
| <b>structure:</b>             | <b>12</b>                    |            |           |            |
| <b>method:</b>                | B3PW91/6-31G*//B3PW91/6-31G* |            |           |            |
| <b>cartesian coordinates:</b> | H                            | - .455955  | 3 .289255 | - .339516  |
|                               | O                            | .768159    | 1 .356362 | -1 .981267 |
|                               | C                            | -1 .342396 | 2 .802176 | .062847    |

<sup>1</sup> Gaussian 98, Revision A.9, M. J. Frisch, G. W. Trucks, H. B. Schlegel, G. E. Scuseria, M. A. Robb, J. R. Cheeseman, V. G. Zakrzewski, J. A. Montgomery, Jr., R. E. Stratmann, J. C. Burant, S. Dapprich, J. M. Millam, A. D. Daniels, K. N. Kudin, M. C. Strain, O. Farkas, J. Tomasi, V. Barone, M. Cossi, R. Cammi, B. Mennucci, C. Pomelli, C. Adamo, S. Clifford, J. Ochterski, G. A. Petersson, P. Y. Ayala, Q. Cui, K. Morokuma, D. K. Malick, A. D. Rabuck, K. Raghavachari, J. B. Foresman, J. Cioslowski, J. V. Ortiz, A. G. Baboul, B. B. Stefanov, G. Liu, A. Liashenko, P. Piskorz, I. Komaromi, R. Gomperts, R. L. Martin, D. J. Fox, T. Keith, M. A. Al-Laham, C. Y. Peng, A. Nanayakkara, M. Challacombe, P. M. W. Gill, B. Johnson, W. Chen, M. W. Wong, J. L. Andres, C. Gonzalez, M. Head-Gordon, E. S. Replogle, and J. A. Pople, Gaussian, Inc., Pittsburgh PA, 1998.

<sup>2</sup> B3PW91 = BECKES 3-parameter functional (B3) with the nonlocal correlation provided by the PERDEW-WANG 91 expression (PW91).

<sup>3</sup> A. D. Becke, *J. Chem. Phys.* **1993**, *98*, 5648-5652.

<sup>4</sup> J. P. Perdew, J. A. Chevary, S. H. Vosko, K. A. Jackson, M. R. Pederson, D. J. Singh and C. Fiolhais, *Phys. Rev. B* **1992**, *46*, 6671-6687.

This journal is © The Royal Society of Chemistry and Owner Societies 2006

|   |           |           |           |
|---|-----------|-----------|-----------|
| C | -1.661944 | 1.464061  | -.562242  |
| C | .770277   | .725343   | -.825877  |
| O | -1.237228 | -1.902198 | 1.427657  |
| C | -.593582  | .411128   | -.271536  |
| O | -1.012196 | -.876208  | -.861173  |
| S | -1.848196 | -1.900761 | .099255   |
| C | -1.427781 | -3.401162 | -.768671  |
| O | -3.277718 | -1.650470 | -.031513  |
| H | -1.759949 | -3.309118 | -1.803878 |
| H | -.348680  | -3.549292 | -.713409  |
| H | -1.957842 | -4.215318 | -.269404  |
| C | 2.014719  | .277753   | -.272834  |
| H | -.482002  | .264335   | .806631   |
| H | -1.786706 | 1.559130  | -1.647799 |
| H | -2.611041 | 1.081880  | -.167730  |
| C | -2.458907 | 3.720616  | .481770   |
| C | -1.619144 | 3.038064  | 1.526262  |
| C | 2.067855  | -.609739  | .831331   |
| C | 3.292982  | -1.004455 | 1.347846  |
| C | 4.492195  | -.557145  | .783752   |
| C | 4.450659  | .303646   | -.316837  |
| C | 3.238069  | .718597   | -.843190  |
| H | 1.155098  | -.998204  | 1.273060  |
| H | 3.312758  | -1.678353 | 2.200850  |
| H | 5.445205  | -.876722  | 1.195839  |
| H | 5.375519  | .659471   | -.764333  |
| H | 3.215843  | 1.402984  | -1.686805 |
| H | -3.480527 | 3.374214  | .345143   |
| H | -2.327822 | 4.788265  | .328475   |
| H | -.911637  | 3.635044  | 2.095042  |
| H | -2.077269 | 2.231420  | 2.094406  |

**structure:****TS-12****method:**

B3PW91/6-31G\*\*/B3PW91/6-31G\*

**cartesian coordinates:**

|   |           |           |           |
|---|-----------|-----------|-----------|
| O | .582406   | 2.242756  | .409456   |
| C | -1.800697 | 2.222514  | -.150373  |
| C | -1.470652 | 1.193275  | -1.187016 |
| C | .797747   | 1.033859  | -.128654  |
| O | -3.134396 | -1.591750 | -.136511  |
| C | -.365246  | .271459   | -.678435  |
| O | -.890383  | -.569864  | .431039   |
| S | -1.716400 | -1.909599 | .011709   |
| C | -1.470538 | -2.807833 | 1.533460  |
| O | -1.014402 | -2.577507 | -1.082500 |
| H | -.402490  | -2.982783 | 1.668327  |
| H | -1.878673 | -2.219219 | 2.356429  |
| H | -2.009678 | -3.752733 | 1.435709  |
| C | 2.127849  | .506564   | -.065308  |
| H | -.040084  | -.413221  | -1.464880 |
| H | -1.114440 | 1.677621  | -2.105149 |
| H | -2.358393 | .597722   | -1.440466 |
| C | -2.838408 | 3.278066  | -.194781  |
| C | 2.441325  | -.806103  | -.501149  |
| C | 3.744603  | -1.277817 | -.442712  |
| C | 4.776480  | -.475949  | .053224   |
| C | 4.480874  | .816200   | .497456   |

This journal is © The Royal Society of Chemistry and Owner Societies 2006

|   |           |           |           |
|---|-----------|-----------|-----------|
| C | 3.184740  | 1.304251  | .443651   |
| H | 1.661012  | -1.464892 | -.871197  |
| H | 3.958079  | -2.288042 | -.783969  |
| H | 5.794389  | -.853714  | .095890   |
| H | 5.273319  | 1.450039  | .888724   |
| H | 2.964017  | 2.310101  | .786668   |
| H | -3.544482 | 3.262140  | -1.023534 |
| H | -2.594755 | 4.276535  | .161442   |
| C | -2.885829 | 2.172549  | .856249   |
| H | -2.670327 | 2.469965  | 1.879990  |
| H | -3.614765 | 1.369869  | .764318   |
| H | -.639631  | 2.498917  | .278791   |

**structure:****15****method:**

B3PW91/6-31G\*\*/B3PW91/6-31G\*

**cartesian coordinates:**

|   |           |           |           |
|---|-----------|-----------|-----------|
| H | 1.452292  | -.589715  | -1.171676 |
| O | -.208152  | 2.589051  | -.308410  |
| C | 2.314159  | -.446213  | -.522004  |
| C | 2.389772  | .916740   | .124479   |
| C | -.128676  | 1.410186  | .272875   |
| C | 1.184094  | 1.253877  | 1.020660  |
| C | -1.178113 | .460572   | .148151   |
| H | 1.384576  | 2.190164  | 1.557967  |
| H | 2.491690  | 1.693539  | -.644382  |
| H | 3.295215  | .974088   | .745983   |
| C | 3.573095  | -1.154122 | -.940575  |
| C | -1.087803 | -.848031  | .696754   |
| C | -2.140333 | -1.739446 | .567676   |
| C | -3.310676 | -1.382375 | -.112122  |
| C | -3.410338 | -.101008  | -.666702  |
| C | -2.373524 | .807453   | -.545880  |
| H | -.183866  | -1.161581 | 1.209631  |
| H | -2.046989 | -2.733332 | .999429   |
| H | -4.128850 | -2.090263 | -.208947  |
| H | -4.313716 | .191333   | -1.197126 |
| H | -2.469071 | 1.802975  | -.971299  |
| H | 4.523808  | -.668536  | -.731840  |
| H | 3.561510  | -1.724986 | -1.865131 |
| C | 2.776427  | -1.669338 | .228796   |
| H | 2.219853  | -2.594666 | .106830   |
| H | 3.194023  | -1.529878 | 1.223979  |
| H | 1.036235  | .478672   | 1.781211  |

**structure:****TS-15****method:**

B3PW91/6-31G\*\*/B3PW91/6-31G\*

**cartesian coordinates:**

|   |           |           |           |
|---|-----------|-----------|-----------|
| O | .704571   | -1.146299 | .060348   |
| C | 2.914344  | -.111149  | -.116839  |
| C | 2.227471  | 1.132090  | -.597923  |
| C | .056058   | .033459   | .027954   |
| C | .886520   | 1.290791  | .130126   |
| C | -1.365631 | -.007513  | .023467   |
| H | .334447   | 2.138029  | -.286358  |
| H | 2.058969  | 1.071158  | -1.680276 |
| H | 2.860934  | 2.012176  | -.408374  |
| C | 4.230735  | -.666364  | -.505881  |
| C | -2.164240 | 1.166691  | .105179   |

This journal is © The Royal Society of Chemistry and Owner Societies 2006

|   |           |           |           |
|---|-----------|-----------|-----------|
| C | -3.547907 | 1.090983  | .082741   |
| C | -4.199811 | -.143041  | -.011529  |
| C | -3.431213 | -1.310852 | -.082161  |
| C | -2.048240 | -1.254362 | -.064809  |
| H | -1.693792 | 2.141210  | .198117   |
| H | -4.129977 | 2.007866  | .145759   |
| H | -5.285024 | -.193734  | -.027042  |
| H | -3.922980 | -2.278623 | -.153765  |
| H | -1.463279 | -2.166641 | -.125769  |
| H | 4.875447  | -.053541  | -1.134435 |
| H | 4.324843  | -1.735220 | -.685302  |
| C | 3.959718  | -.231486  | .929981   |
| H | 3.878535  | -1.020854 | 1.674001  |
| H | 4.417833  | .684351   | 1.301102  |
| H | 1.082662  | 1.529057  | 1.189464  |
| H | 1.917986  | -.900324  | -.011740  |

**structure: 21****method: B3PW91/6-31G\*\*/B3PW91/6-31G\***

|                               |   |           |           |           |
|-------------------------------|---|-----------|-----------|-----------|
| <b>cartesian coordinates:</b> | H | 1.811522  | -.065775  | -1.253166 |
|                               | O | .240921   | 2.243880  | -.090571  |
|                               | C | 2.542798  | -.424292  | -.514053  |
|                               | C | 2.476988  | .514233   | .699031   |
|                               | C | -.020323  | 1.081252  | .469671   |
|                               | C | 1.106163  | .634449   | 1.386554  |
|                               | C | -1.247444 | .412954   | .204284   |
|                               | H | 1.189064  | 1.350542  | 2.216619  |
|                               | H | 2.805635  | 1.515000  | .391352   |
|                               | H | 3.196798  | .172977   | 1.457951  |
|                               | C | 3.932082  | -.350976  | -1.153061 |
|                               | C | -1.615222 | -.805497  | .837775   |
|                               | C | -2.821260 | -1.419876 | .541695   |
|                               | C | -3.711341 | -.858634  | -.380680  |
|                               | C | -3.368938 | .345397   | -1.006572 |
|                               | C | -2.168887 | .974982   | -.726984  |
|                               | H | -.958766  | -1.264160 | 1.571012  |
|                               | H | -3.075337 | -2.351699 | 1.041585  |
|                               | H | -4.654349 | -1.348771 | -.604807  |
|                               | H | -4.050466 | .796632   | -1.724070 |
|                               | H | -1.915025 | 1.907164  | -1.224813 |
|                               | H | 4.705156  | -.699981  | -.455715  |
|                               | H | 4.185846  | .674908   | -1.445637 |
|                               | H | 3.988334  | -.978231  | -2.050293 |
|                               | C | 2.185921  | -1.869482 | -.158181  |
|                               | H | 1.154382  | -1.964301 | .197485   |
|                               | H | 2.854028  | -2.259309 | .621706   |
|                               | H | 2.285747  | -2.520820 | -1.034142 |
|                               | H | .806844   | -.322278  | 1.822632  |

**structure: TS-21****method: B3PW91/6-31G\*\*/B3PW91/6-31G\***

|                               |   |          |           |          |
|-------------------------------|---|----------|-----------|----------|
| <b>cartesian coordinates:</b> | O | .670994  | -1.135357 | .228723  |
|                               | C | 2.958788 | -.133199  | -.027011 |
|                               | C | 2.221488 | 1.040212  | -.661367 |
|                               | C | .029835  | .026630   | .044149  |
|                               | C | .861697  | 1.287251  | .000743  |

This journal is © The Royal Society of Chemistry and Owner Societies 2006

|   |           |           |           |
|---|-----------|-----------|-----------|
| C | -1.393498 | -.007118  | .023549   |
| H | .321885   | 2.064626  | -.548414  |
| H | 2.068633  | .838560   | -1.728701 |
| H | 2.835859  | 1.951079  | -.588862  |
| C | 3.901443  | -.873664  | -.954067  |
| C | -2.183947 | 1.174042  | -.031005  |
| C | -3.567774 | 1.104004  | -.065333  |
| C | -4.227438 | -.129215  | -.037900  |
| C | -3.466500 | -1.302454 | .026986   |
| C | -2.083579 | -1.252511 | .058913   |
| H | -1.707263 | 2.149959  | -.033674  |
| H | -4.143970 | 2.025799  | -.107705  |
| H | -5.312653 | -.174962  | -.063866  |
| H | -3.964264 | -2.269526 | .050862   |
| H | -1.504752 | -2.169921 | .102619   |
| H | 4.744628  | -.223880  | -1.233154 |
| H | 3.398836  | -1.179340 | -1.877764 |
| H | 4.319665  | -1.766082 | -.475974  |
| C | 3.531645  | .132981   | 1.352723  |
| H | 2.799295  | .593140   | 2.023308  |
| H | 4.391258  | .815068   | 1.275528  |
| H | 3.885830  | -.791088  | 1.822079  |
| H | 1.010340  | 1.680974  | 1.020737  |
| H | 1.995758  | -.863313  | .150912   |

**structure:****22****method:**

B3PW91/6-31G\*//B3PW91/6-31G\*

**cartesian coordinates:**

|   |           |           |           |
|---|-----------|-----------|-----------|
| H | 1.409856  | -2.790061 | .377232   |
| C | 2.240514  | -2.171725 | -.020049  |
| C | 1.610713  | -1.182119 | -1.007202 |
| C | -.732053  | -1.118242 | .034725   |
| O | 2.833351  | 2.029250  | -.222717  |
| C | .426493   | -.345543  | -.537535  |
| O | .833892   | .643040   | .487742   |
| S | 1.387541  | 2.084544  | -.045797  |
| C | 1.007141  | 3.020886  | 1.424277  |
| O | .544337   | 2.529646  | -1.154289 |
| H | -.070953  | 2.997695  | 1.587599  |
| H | 1.542332  | 2.579887  | 2.266582  |
| H | 1.351308  | 4.042279  | 1.247104  |
| C | -2.095962 | -.667436  | -.013913  |
| H | .038583   | .229192   | -1.383973 |
| H | 1.255069  | -1.738688 | -1.885475 |
| H | 2.378997  | -.486297  | -1.371120 |
| C | 3.194482  | -3.111272 | -.763163  |
| C | -2.452198 | .600548   | -.538340  |
| C | -3.783903 | .985411   | -.589602  |
| C | -4.795723 | .149049   | -.107702  |
| C | -4.454222 | -1.095282 | .429721   |
| C | -3.131206 | -1.504089 | .480061   |
| H | -1.690160 | 1.286768  | -.895482  |
| H | -4.035802 | 1.957819  | -1.005826 |
| H | -5.834716 | .463642   | -.149839  |
| H | -5.230785 | -1.756459 | .806686   |
| H | -2.877780 | -2.481536 | .880254   |
| H | 4.035387  | -2.548924 | -1.189983 |

This journal is © The Royal Society of Chemistry and Owner Societies 2006

|   |          |           |           |
|---|----------|-----------|-----------|
| H | 2.691772 | -3.637450 | -1.583124 |
| H | 3.610575 | -3.863630 | -.084093  |
| C | 2.938912 | -1.511062 | 1.169249  |
| H | 2.236824 | -.953132  | 1.793045  |
| H | 3.711451 | -.810789  | .828033   |
| H | 3.422589 | -2.269761 | 1.795491  |
| O | -.459472 | -2.185436 | .756323   |

**structure:** TS-22**method:** B3PW91/6-31G\*\*/B3PW91/6-31G\*

|                               |   |           |           |           |
|-------------------------------|---|-----------|-----------|-----------|
| <b>cartesian coordinates:</b> | O | .494245   | 2.222724  | .560941   |
|                               | C | -1.969044 | 2.256613  | -.022431  |
|                               | C | -1.594777 | 1.179308  | -1.035865 |
|                               | C | .719301   | 1.055299  | -.040643  |
|                               | O | -3.008416 | -1.893543 | -.141847  |
|                               | C | -.436936  | .286495   | -.599002  |
|                               | O | -.876600  | -.668866  | .457509   |
|                               | S | -1.562699 | -2.062840 | -.041584  |
|                               | C | -1.179518 | -3.030978 | 1.407473  |
|                               | O | -.817513  | -2.572612 | -1.191202 |
|                               | H | -.095600  | -3.086789 | 1.515110  |
|                               | H | -1.636495 | -2.555848 | 2.276822  |
|                               | H | -1.605675 | -4.024000 | 1.248054  |
|                               | C | 2.063763  | .552088   | -.032173  |
|                               | H | -.102870  | -.326656  | -1.439676 |
|                               | H | -1.283905 | 1.657502  | -1.973477 |
|                               | H | -2.463842 | .547478   | -1.264582 |
|                               | C | -2.486393 | 3.537942  | -.650036  |
|                               | C | 2.393431  | -.729915  | -.540244  |
|                               | C | 3.707863  | -1.174397 | -.533536  |
|                               | C | 4.733824  | -.376711  | -.019367  |
|                               | C | 4.421672  | .885023   | .495130   |
|                               | C | 3.114813  | 1.346873  | .492915   |
|                               | H | 1.620295  | -1.385323 | -.930318  |
|                               | H | 3.934497  | -2.160652 | -.931774  |
|                               | H | 5.760015  | -.733871  | -.017760  |
|                               | H | 5.209225  | 1.516187  | .900329   |
|                               | H | 2.882511  | 2.330498  | .889198   |
|                               | H | -3.449457 | 3.348474  | -1.146606 |
|                               | H | -1.794941 | 3.929089  | -1.404055 |
|                               | H | -2.652699 | 4.314374  | .104081   |
|                               | C | -2.782336 | 1.785212  | 1.169777  |
|                               | H | -2.306657 | .943270   | 1.676781  |
|                               | H | -3.774037 | 1.450644  | .833277   |
|                               | H | -2.929223 | 2.596657  | 1.890747  |
|                               | H | -.875663  | 2.505648  | .403994   |
